# Supplementary material for: Zero-strain reductive intercalation in a molecular framework
Source: Royal Society of Chemistry journal article supplement (doi:10.1039/c4ce02364a), 2015-01-01
Supplement: c4ce02364a1.pdf [file c4ce02364a1.pdf]

# Zero-strain reductive intercalation in a molecular framework

## SUPPLEMENTARY INFORMATION

Joshua A. Hill,<sup>1</sup> Andrew B. Cairns,<sup>1</sup> Jared Lim,<sup>1</sup> Simon J. Cassidy,<sup>1</sup>  
Simon J. Clarke,<sup>1</sup> and Andrew L. Goodwin<sup>1\*</sup>

<sup>1</sup>Department of Chemistry, University of Oxford, Inorganic Chemistry Laboratory,  
South Parks Road, Oxford OX1 3QR, U.K.

\*To whom correspondence should be addressed; E-mail: [andrew.goodwin@chem.ox.ac.uk](mailto:andrew.goodwin@chem.ox.ac.uk).

**Submitted to CrystEngComm**

# 1 Materials and Methods

## Synthesis

$\text{Ag}_3[\text{Fe}(\text{CN})_6]$  was prepared from an aqueous solutions of  $\text{Ag}(\text{NO}_3)_2$  (Sigma-Aldrich) and  $\text{K}_3\text{Fe}(\text{CN})_6$  (Sigma-Aldrich) mixed at room temperature with stirring as described previously.<sup>S1</sup> The resulting precipitate was filtered, washed with  $\text{H}_2\text{O}$  ( $3 \times 5$  ml) and dried at  $50^\circ\text{C}$  overnight to yield a brick-red polycrystalline solid.

Conversion of  $\text{Ag}_3[\text{Fe}(\text{CN})_6]$  to  $\text{KAg}_3[\text{Fe}(\text{CN})_6]$  was performed using a solution of potassium naphthalenide in 25 ml tetrahydrofuran (THF) under nitrogen. Stoichiometric potassium naphthalenide — prepared by the reaction, under nitrogen with at least 5 hours stirring, of potassium metal with naphthalene dissolved in 25 ml THF — was chilled to between  $-5^\circ\text{C}$  and  $0^\circ\text{C}$  with a salt-ice bath and added to  $\text{Ag}_3\text{Fe}(\text{CN})_6$ . This mixture was stirred at between  $-5$  to  $0^\circ\text{C}$  overnight. The resulting suspension was filtered then washed twice with 20 ml dry THF. The resulting brown powder was dried under vacuum for 2 hours.

## Characterisation

Room temperature powder diffraction patterns were collected using a PANalytical X'Pert Pro diffractometer according to a 6 h scan regime using variable divergence slit width (fixed sample illumination of 10 cm) on a rotating sample.

Infrared spectra were collected at room temperature using a Bruker Tensor27 FT-IR spectrometer fitted with a diamond attenuated total reflection (ATR) module operated with the OPUS data collection programme.

# 2 Data & Refinements

## Powder X-ray diffraction and infrared spectroscopy

Rietveld analysis of powder X-ray diffraction patterns was carried out with TOPAS Academic V4.1 by non-linear least squares refinement.<sup>S2</sup> In both cases variable divergence intensity with a TCHZ peak-shape and simple axial model were used. Special positions and constraints are noted in Tables S1 and S2 as appropriate.

**Table S1:** X-ray powder diffraction structural and refinement parameters for  $\text{Ag}_3[\text{Fe}(\text{CN})_6]$ . Estimated standard deviations are given in parentheses. Atom positions were fixed to those determined in a previous neutron diffraction study.<sup>S1</sup>

| $R_{wp}$              | 5.462         |     |               |                            |
|-----------------------|---------------|-----|---------------|----------------------------|
| $a$ (Å)               | 7.0279(5)     |     |               |                            |
| $c$ (Å)               | 7.2546(5)     |     |               |                            |
| $V$ (Å <sup>3</sup> ) | 310.31(5)     |     |               |                            |
| Atom                  | $x$           | $y$ | $z$           | $B_{eq}$ (Å <sup>2</sup> ) |
| Fe <sup>†</sup>       | 0             | 0   | 0             | 5.36(14)                   |
| Ag <sup>†</sup>       | $\frac{1}{2}$ | 0   | $\frac{1}{2}$ | 8.50(6)                    |
| C <sup>‡</sup>        | 0.22037       | 0   | 0.16111       | 6.1(3)                     |
| N <sup>‡</sup>        | 0.33609       | 0   | 0.26732       | 6.1(3)                     |

<sup>†</sup> Refined with anisotropic displacement parameters

<sup>‡</sup> Refined with isotropic displacement parameters constrained to be identical.

**Table S2:** X-ray powder diffraction structural and refinement parameters for  $\text{KAg}_3[\text{Fe}(\text{CN})_6]$  resulting from a two-phase refinement with  $\text{Ag}_3[\text{Fe}(\text{CN})_6]$  (see Table S1). Estimated standard deviations are given in parentheses.  $\text{Ag}_3[\text{Fe}(\text{CN})_6]$  structure is fixed to the values resulting from refinement of  $\text{Ag}_3[\text{Fe}(\text{CN})_6]$  alone. Atomic positions are fixed to those reported for  $\text{KMn}[\text{Ag}(\text{CN})_2]_3$  and were not refined.<sup>S5</sup> Weight percent of product may be underestimated due to peak anisotropy of  $\text{KAg}_3[\text{Fe}(\text{CN})_6]$ .

| $R_{wp}$              | 5.591         |               |               |           |                            |
|-----------------------|---------------|---------------|---------------|-----------|----------------------------|
| Weight percent        | 85.7(4)       |               |               |           |                            |
| $a$ (Å)               | 7.0698(2)     |               |               |           |                            |
| $c$ (Å)               | 7.1836(3)     |               |               |           |                            |
| $V$ (Å <sup>3</sup> ) | 310.95(3)     |               |               |           |                            |
| Atom                  | $x$           | $y$           | $z$           | Occ.      | $B_{eq}$ (Å <sup>2</sup> ) |
| K*                    | $\frac{1}{3}$ | $\frac{2}{3}$ | 0             | 0.920(13) | 4.1(4)                     |
| Fe                    | 0             | 0             | 0             | 1         | 4.15(13)                   |
| Ag <sup>†</sup>       | 0.50467       | 0.00934       | $\frac{1}{2}$ | 1         | 7.25(7)                    |
| C <sup>‡</sup>        | 0.2553        | -0.0045       | 0.1669        | 1         | 8.1(4)                     |
| N <sup>‡</sup>        | 0.3462        | 0.0033        | 0.2837        | 1         | 8.1(4)                     |

<sup>†</sup> Refined with anisotropic displacement parameters

<sup>‡</sup> Refined with isotropic displacement parameters constrained to be identical.

**Figure S1:** Infrared (IR) spectra are in excellent agreement with previous work on thin films of  $\text{Ag}_3\text{Fe}(\text{CN})_6$  and  $\text{KAg}_3\text{Fe}(\text{CN})_6$  made by electrochemical reduction. The corresponding asymmetric cyanide stretching frequencies reported in Ref. S3 are 2169 and  $2093\text{ cm}^{-1}$ , respectively; here we observe these stretches at  $2169.6\text{ cm}^{-1}$  and  $2091.1\text{ cm}^{-1}$ . The  $\pi$ -bonding interaction between low-lying CN  $\pi^*$  and Fe  $t_{2g}$  orbitals is dependent on d-orbital occupancy. Reduction from  $\text{M}^{\text{III}}$  to  $\text{M}^{\text{II}}$  results in a red shift in the asymmetric C–N stretching due to greater availability of  $t_{2g}$  d-electrons, and therefore more significant back-bonding. There is a small residual reagent peak in the  $\text{KAg}_3\text{Fe}(\text{CN})_6$  pattern at  $2169.7\text{ cm}^{-1}$ , consistent with the remaining starting material indicated by PXRD. The extra peaks in the starting material at  $2113.898$  and  $2096.41\text{ cm}^{-1}$  are likely due to decomposition of the starting material. (Silver hexacyanoferrate changes colour from brick red to green over a period of months. IR spectra were collected over a month after synthesis, leaving sufficient time for some degradation.) All other IR active fundamental modes are below  $600\text{ cm}^{-1}$ .

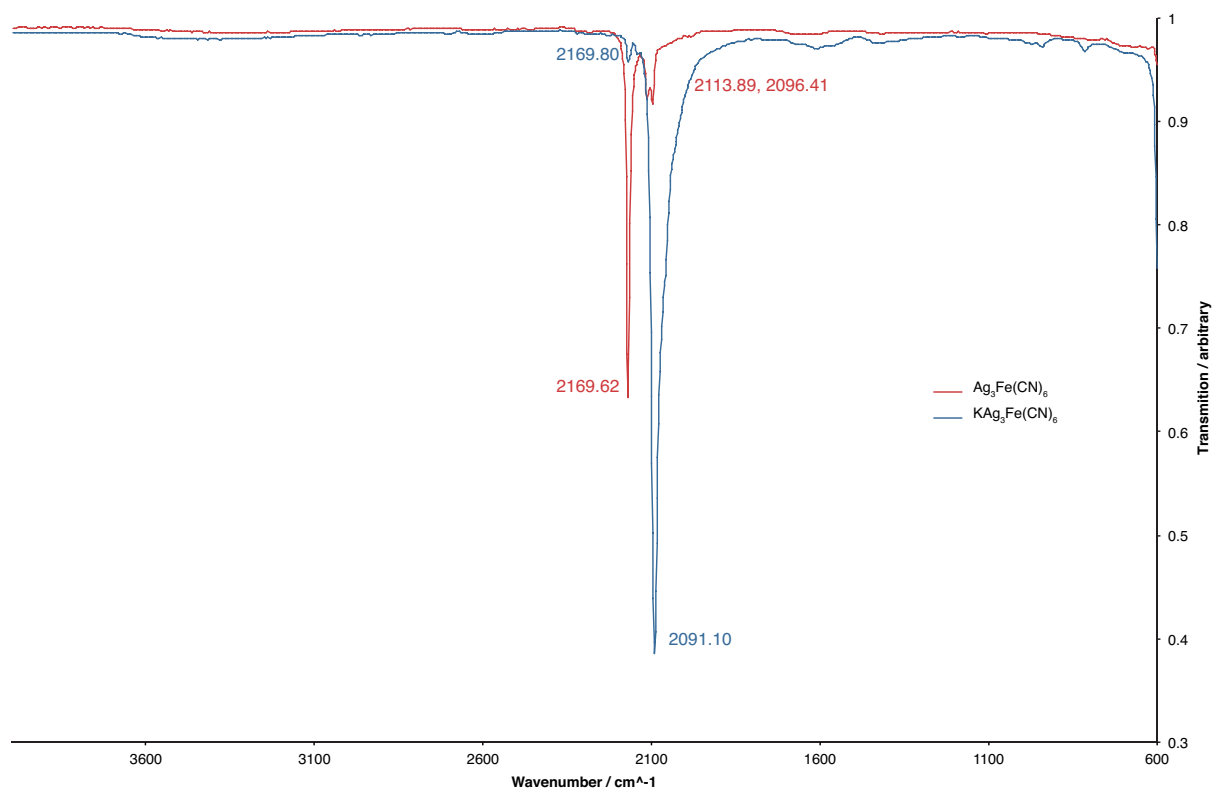

**Table S3:** Crystallographic data for various topical and canonical intercalation ion-storage compounds in deintercalated and intercalated states. Cell symmetry and size normalised to cell contents where necessary (indicated by \*). In each case the intercalated ion is indicated in bold for the intercalated compound.

| Compound                                                              | $V$ ( $\text{\AA}^3$ ) | $a$ ( $\text{\AA}$ ) | $b$ ( $\text{\AA}$ ) | $c$ ( $\text{\AA}$ ) | $\alpha$ ( $^\circ$ ) | $\beta$ ( $^\circ$ ) | $\gamma$ ( $^\circ$ ) | $ \Delta V $ ( $\text{\AA}^3$ ) | $ \Delta V/V $ (%) | Formula units per cell | $e^-$ per formula unit | Normalised $ \Delta V $ ( $\text{\AA}^3/e^-$ ) | Stored charge density ( $e^-/\text{\AA}^3$ ) | Ref.      |
|-----------------------------------------------------------------------|------------------------|----------------------|----------------------|----------------------|-----------------------|----------------------|-----------------------|---------------------------------|--------------------|------------------------|------------------------|------------------------------------------------|----------------------------------------------|-----------|
| FeSiO <sub>4</sub>                                                    | 341.45                 | 10.3434              | 6.5779               | 5.0185               | 90                    | 90                   | 90                    | 12.064                          | 3.533              | 8                      | 2.00                   | 0.754                                          | 0.04686                                      | S6        |
| <b>Mg</b> FeSiO <sub>4</sub>                                          | 329.38                 | 10.2464              | 6.5038               | 4.9427               | 90                    | 90                   | 90                    |                                 |                    |                        |                        |                                                |                                              |           |
| Li <sub>0.68</sub> CoO <sub>2</sub>                                   | 97.31                  | 2.8107               | 2.8107               | 14.2235              | 90                    | 90                   | 120                   | 0.823                           | 0.845              | 3                      | 0.32                   | 0.857                                          | 0.00987                                      | S7        |
| LiCoO <sub>2</sub>                                                    | 96.49                  | 2.8156               | 2.8156               | 14.0542              | 90                    | 90                   | 120                   |                                 |                    |                        |                        |                                                |                                              |           |
| FePO <sub>4</sub>                                                     | 271.94                 | 9.8195               | 5.79174              | 4.78166              | 90                    | 90                   | 90                    | 19.198                          | 7.060              | 4                      | 1.00                   | 4.799                                          | 0.01471                                      | S8        |
| <b>Li</b> FePO <sub>4</sub>                                           | 291.14                 | 10.3248              | 6.00715              | 4.69409              | 90                    | 90                   | 90                    |                                 |                    |                        |                        |                                                |                                              |           |
| Li <sub>1.33</sub> Ti <sub>1.67</sub> O <sub>4</sub>                  | 584.17                 | 8.3595               | 8.3595               | 8.3595               | 90                    | 90                   | 90                    | 1.194                           | 0.204              | 8                      | 1.00                   | 0.149                                          | 0.01369                                      | S9        |
| <b>Li</b> <sub>2.33</sub> Ti <sub>1.67</sub> O <sub>4</sub>           | 582.98                 | 8.3538               | 8.3538               | 8.3538               | 90                    | 90                   | 90                    |                                 |                    |                        |                        |                                                |                                              |           |
| 2,6-Naph(COOLi) <sub>2</sub>                                          | 468.08                 | 10.27                | 5.34                 | 8.63                 | 90                    | 98.83                | 90                    | 1.545                           | 0.330              | 2                      | 2.00                   | 0.386                                          | 0.00855                                      | S10       |
| <b>Li</b> <sub>2</sub> [2,6-Naph(COOLi) <sub>2</sub> ]                | 469.62                 | 9.709                | 5.965                | 8.417                | 90                    | 105.55               | 90                    |                                 |                    |                        |                        |                                                |                                              |           |
| C*                                                                    | 52.90                  | 4.26                 | 4.26                 | 3.36                 | 90                    | 90                   | 120                   | 1.121                           | 2.119              | 1                      | 1.00                   | 1.121                                          | 0.01890                                      | S11       |
| <b>Li</b> C <sub>6</sub>                                              | 51.78                  | 4.0307               | 4.0307               | 3.68                 | 90                    | 90                   | 120                   |                                 |                    |                        |                        |                                                |                                              |           |
| Mn <sub>2</sub> (CN) <sub>6</sub> *                                   | 1227.10                | 10.71                | 10.71                | 10.71                | 90                    | 90                   | 90                    | 16.669                          | 1.358              | 4                      | 3.00                   | 1.389                                          | 0.00978                                      | S12       |
| <b>Na</b> <sub>3</sub> Mn <sub>2</sub> (CN) <sub>6</sub> *            | 1243.77                | 10.459               | 10.905               | 10.905               | 90                    | 90                   | 90                    |                                 |                    |                        |                        |                                                |                                              |           |
| Na <sub>0.5</sub> VP <sub>4.8</sub> F <sub>0.7</sub>                  | 842.24                 | 8.80                 | 8.80                 | 10.88                | 90                    | 90                   | 90                    | 25.829                          | 3.067              | 8                      | 1.00                   | 3.229                                          | 0.00950                                      | S13       |
| <b>Na</b> <sub>1.5</sub> VP <sub>4.8</sub> F <sub>0.7</sub>           | 868.07                 | 9.035                | 9.035                | 10.634               | 90                    | 90                   | 90                    |                                 |                    |                        |                        |                                                |                                              |           |
| NaFePO <sub>4</sub> F                                                 | 851.85                 | 5.22                 | 13.85                | 11.78                | 90                    | 90                   | 90                    | 31.909                          | 3.746              | 8                      | 1.00                   | 3.989                                          | 0.00939                                      | S14       |
| <b>Na</b> <sub>2</sub> FePO <sub>4</sub> F                            | 819.94                 | 5.1047               | 14.133               | 11.366               | 90                    | 90                   | 90                    |                                 |                    |                        |                        |                                                |                                              |           |
| Na <sub>0.04</sub> Ni[Fe(CN) <sub>6</sub> ] <sub>0.71</sub>           | 1058.09                | 10.19                | 10.19                | 10.19                | 90                    | 90                   | 90                    | 6.242                           | 0.590              | 4                      | 0.80                   | 1.951                                          | 0.00302                                      | S15       |
| <b>Na</b> <sub>0.84</sub> Ni[Fe(CN) <sub>6</sub> ] <sub>0.71</sub>    | 1064.33                | 10.21                | 10.21                | 10.21                | 90                    | 90                   | 90                    |                                 |                    |                        |                        |                                                |                                              |           |
| $\beta$ -NaFeP <sub>2</sub> O <sub>7</sub>                            | 562.09                 | 6.33                 | 9.46                 | 11.10                | 62.611                | 83.29                | 72.242                | 18.962                          | 3.374              | 3                      | 1.00                   | 6.321                                          | 0.00534                                      | S16       |
| <b>Na</b> <sub>2</sub> FeP <sub>2</sub> O <sub>7</sub>                | 581.05                 | 6.4490               | 9.4825               | 10.9933              | 64.847                | 86.240               | 73.133                |                                 |                    |                        |                        |                                                |                                              |           |
| NaV <sub>2</sub> (PO <sub>4</sub> ) <sub>3</sub>                      | 1321.57                | 8.43                 | 8.43                 | 21.49                | 90                    | 90                   | 120                   | 120.909                         | 9.149              | 6                      | 2.00                   | 10.076                                         | 0.00908                                      | S17, S18  |
| <b>Na</b> <sub>3</sub> V <sub>2</sub> (PO <sub>4</sub> ) <sub>3</sub> | 1442.48                | 8.738                | 8.738                | 21.815               | 90                    | 90                   | 120                   |                                 |                    |                        |                        |                                                |                                              |           |
| NaMn <sub>2</sub> (CN) <sub>6</sub> *                                 | 1235.13                | 10.69                | 10.75                | 10.75                | 90                    | 90                   | 90                    | 33.981                          | 2.751              | 4                      | 1.00                   | 8.495                                          | 0.00324                                      | S12       |
| <b>Na</b> <sub>2</sub> Mn <sub>2</sub> (CN) <sub>6</sub> *            | 1201.15                | 10.658               | 10.616               | 10.616               | 90                    | 90                   | 90                    |                                 |                    |                        |                        |                                                |                                              |           |
| CuHCF                                                                 | 1015.08                | 10.05                | 10.05                | 10.05                | 90                    | 90                   | 90                    | 27.516                          | 2.711              | 4                      | 0.72                   | 9.554                                          | 0.00284                                      | S19       |
| <b>K</b> <sub>0.7</sub> CuHCF                                         | 1042.59                | 10.14                | 10.14                | 10.14                | 90                    | 90                   | 90                    |                                 |                    |                        |                        |                                                |                                              |           |
| Ag <sub>3</sub> Fe(CN) <sub>6</sub>                                   | 310.31                 | 7.03                 | 7.03                 | 7.25                 | 90                    | 90                   | 120                   | 0.640                           | 0.206              | 1                      | 0.92                   | 0.696                                          | 0.00296                                      | This work |
| <b>K</b> <sub>0.92</sub> Ag <sub>3</sub> Fe(CN) <sub>6</sub>          | 310.95                 | 7.0698               | 7.0698               | 7.1836               | 90                    | 90                   | 120                   |                                 |                    |                        |                        |                                                |                                              |           |
| C*                                                                    | 566.09                 | 4.93                 | 8.54                 | 13.46                | 90                    | 90                   | 90                    | 329.915                         | 58.280             | 8                      | 1.00                   | 41.239                                         | 0.01413                                      | S20       |
| <b>K</b> C <sub>8</sub>                                               | 896.00                 | 4.92                 | 8.51                 | 21.4                 | 90                    | 90                   | 90                    |                                 |                    |                        |                        |                                                |                                              |           |

### 3 References

- (S1) A. L. Goodwin, D. A. Keen, M. G. Tucker, M. T. Dove, L. Peters, and J. S. Evans. *J. Am. Chem. Soc.*, 130:9660–9661, 2008.
- (S2) A. A. Coelho. *TOPAS-Academic, V4.1*, 2007. Coelho Software.
- (S3) S. B. Moon, A. Xidis, and V. D. Neff. *J. Phys. Chem.*, 97(8):1634–1638, 1993.
- (S4) L. H. Jones. *J. Chem. Phys.*, 26(6):1578–1584, 1957.
- (S5) A. B. Cairns, A. L. Thompson, M. G. Tucker, J. Haines, and A. L. Goodwin. *J. Am. Chem. Soc.*, 2012.
- (S6) Y. Orikasa, T. Masese, Y. Koyama, T. Mori, M. Hattori, K. Yamamoto, T. Okado, Z.-D. Huang, T. Minato, C. Tassel, J. Kim, Y. Kobayashi, T. Abe, H. Kageyama, and Y. Uchi-moto. *Sci. Rep.*, 4:5622, 07 2014.
- (S7) Y. Takahashi, N. Kijima, K. Dokko, M. Nishizawa, I. Uchida, and J. Akimoto. *J. Solid State Chem.*, 180(1):313–321, 2007.
- (S8) A. Yamada, H. Koizumi, N. Sonoyama, and R. Kanno. *Electrochem. Solid St.*, 8(8):A409–A413, 2005.
- (S9) S. Scharner, W. Weppner, and P. Schmid-Beurmann. *J. Electrochem. Soc.*, 146(3):857–861, 1999.
- (S10) N. Ogihara, T. Yasuda, Y. Kishida, T. Ohsuna, K. Miyamoto, and N. Ohba. *Angew. Chem. Int. Ed.*, 53(43):11467–11472, 2014.
- (S11) X.-L. Wang, K. An, L. Cai, Z. Feng, S. E. Nagler, C. Daniel, K. J. Rhodes, A. D. Stoica, H. D. Skorpenske, C. Liang, W. Zhang, J. Kim, Y. Qi, and S. J. Harris. *Sci. Rep.*, 2:747, 10 2012.
- (S12) H.-W. Lee, R. Y. Wang, M. Pasta, S. Woo Lee, N. Liu, and Y. Cui. *Nature Commun.*, 5, doi:10.1038/ncomms6280 2014.
- (S13) Y.-U. Park, D.-H. Seo, H.-S. Kwon, B. Kim, J. Kim, H. Kim, I. Kim, H.-I. Yoo, and K. Kang. *J. Am. Chem. Soc.*, 135(37):13870–13878, 2013.
- (S14) B. L. Ellis, W. R. M. Makahnouk, Y. Makimura, K. Toghill, and L. F. Nazar. *Nature Mater.*, 6(10):749–753, 10 2007.
- (S15) Y. You, X.-L. Wu, Y.-X. Yin, and Y.-G. Guo. *J. Mater. Chem. A*, 1:14061–14065, 2013.
- (S16) P. Barpanda, G. Liu, C. D. Ling, M. Tamaru, M. Avdeev, S.-C. Chung, Y. Yamada, and A. Yamada. *Chem. Mater.*, 25(17):3480–3487, 2013.
- (S17) Z. Jian, L. Zhao, H. Pan, Y.-S. Hu, H. Li, W. Chen, and L. Chen. *Electrochem. Commun.*, 14(1):86–89, 2012.
- (S18) Z. Jian, W. Han, X. Lu, H. Yang, Y.-S. Hu, J. Zhou, Z. Zhou, J. Li, W. Chen, D. Chen, and L. Chen. *Adv. Energy Mater.*, 3(2):156–160, 2013.
- (S19) C. D. Wessells, R. A. Huggins, and Y. Cui. *Nature Commun.*, 2:500, 2011.
- (S20) P. Lagrange, D. Guerard, and A. Herold. *Ann. Chim.*, 3:143–159, 1978.
